# Supplementary material for: Comparison of Single and Combined Use of Catechin, Protocatechuic, and Vanillic Acids as Antioxidant and Antibacterial Agents against Uropathogenic Escherichia Coli at Planktonic and Biofilm Levels
Source: MDPI journal article supplement (doi:10.3390/molecules23112813), 2018-10-30

# Comparison of Single and Combined Use of Catechin, Protocatechuic, and Vanillic Acids as Antioxidant and Antibacterial Agents Against Uropathogenic *Escherichia Coli* at Planktonic and Biofilm Levels

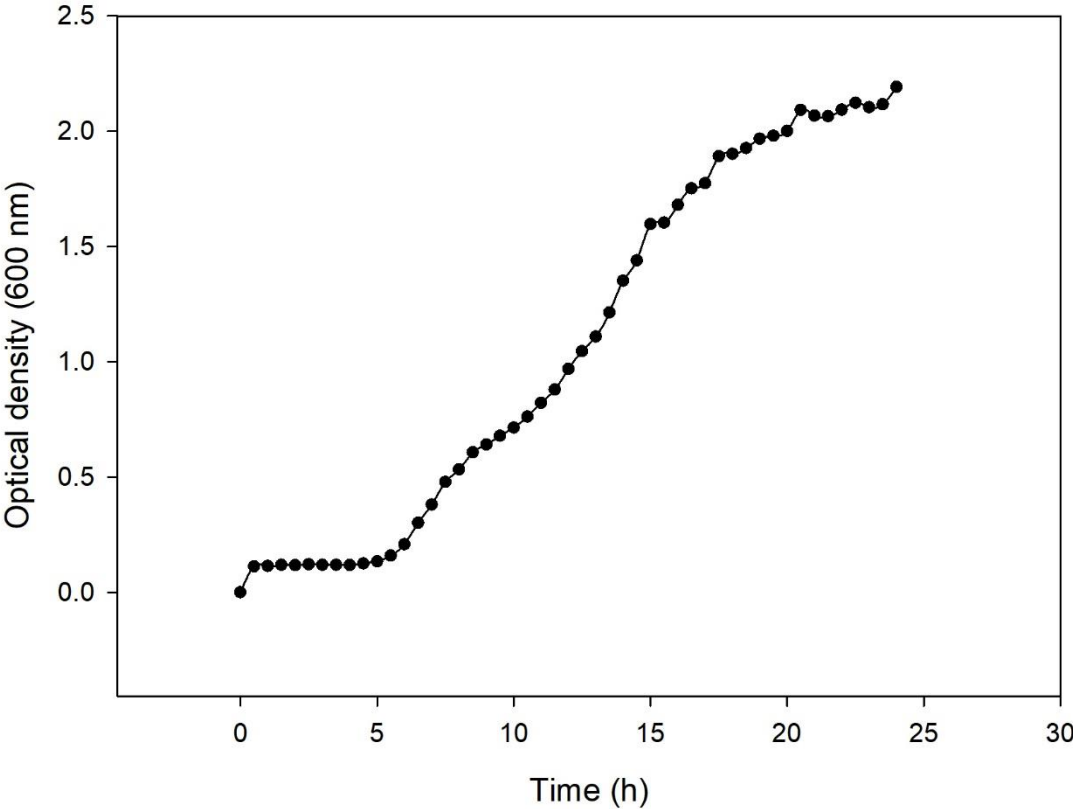

Supplement: s1 [file s1]
